# Supplementary material for: Loss of an H3K9me anchor rescues laminopathy-linked changes in nuclear organization and muscle function in an Emery-Dreifuss muscular dystrophy model
Source: PubMed Central journal article supplement — Genes Dev. 2020 Apr 1;34(7-8):560–79. doi: 10.1101/gad.332213.119 (PMC7111258; doi:10.1101/gad.332213.119), 2020-04-01
Supplement: supp_gad.332213.119_Supplemental_Figures_and_Tables.pdf [file supp_gad.332213.119_Supplemental_Figures_and_Tables.pdf]

Harr et al.

List of Supplemental materials:

**Supplemental Figure S1:** Schematic of genetic insertions for muscle-specific emerin DamID and controls for . muscle-specific EMR-1 DamID. (relates to Figure 1)

**Supplemental Figure S2:** Genes aberrantly tethered, or released from the nuclear periphery in LMN-Y59C are enriched for the binding consensus of the E2F homolog EFL-2. (relates to Figure 1)

**Supplemental Figure S3:** Loss of CEC-4 does not affect heterochromatin array localization in hypoderm, but releases it in early embryos (relates to Figure 3)

**Supplemental Figure S4:** Abnormal sarcomeres and junctions in *LMN-Y59C* mutants are suppressed by *cec-4Δ*, but not *lem2Δ* (relates to Figure 5)

**Supplemental Figure S5:** Heterochromatic array sequestration by the *LMN-Y59C* mutant is rescued by *cec-4Δ* or by the chromodomain deficient *cec-4-CD2YA* mutation (relates to Figure 5)

**Supplemental Figure S6:** Loss of CEC-4 significantly changes chromatin position in the *LMN-Y59C*, but not the *LMN-WT* background. (relates to Figure 6)

**Supplemental Figure S7:** Genes containing EFL-2 motifs that are aberrantly tethered or released from the INM in *LMN-Y59C* muscle are rescued by *LMN-Y59C*; *cec-4Δ* (relates to Figure 7).

**Supplemental Table S1:** 97 genes with differential transcript abundance : '*LMN-Y59C*' vs 'WT'

**Supplemental Table S2:** 118 genes with differential transcript abundance : '*LMN-Y59C*; *cec-4*' vs '*LMN-Y59C*'

**Supplemental Table S3:** 8 genes with differential transcript abundance : '*cec-4Δ*' vs 'WT'

**Supplemental Table S4:** 27 genes with compensatory effects by *cec-4* deletion in the *LMN-Y59C* background

**Supplemental Table S5:** *C. elegans* strains used in the study

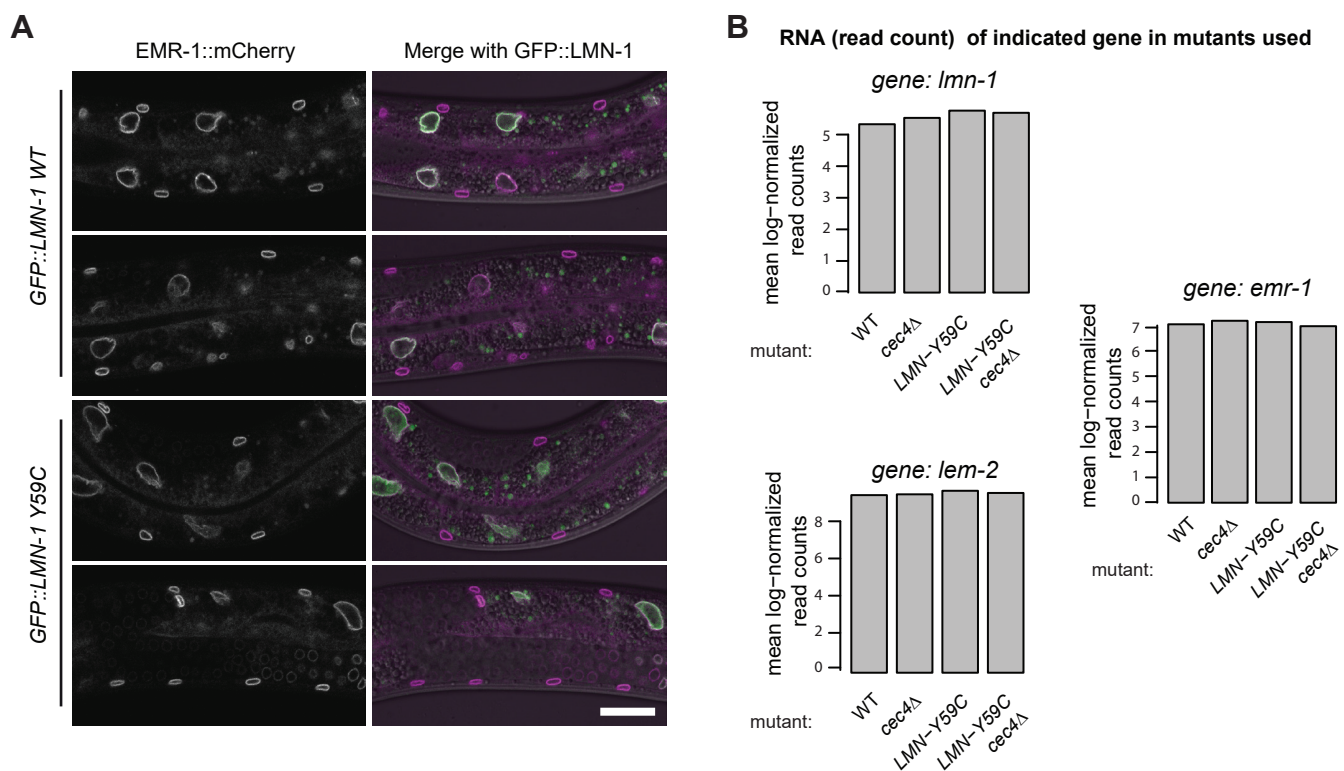

**C** 100 kb bins, absolute values of rolling means of 3 differential DamID log<sub>2</sub> ratios of LMN-Y59C - LMN-WT

| DamID log <sub>2</sub> ratios of LMN-Y59C - LMN-WT   | Total # bins | % total | # bins in chr. arms | % in chr. arms | # bins in chr. core | % in chr. core |
|------------------------------------------------------|--------------|---------|---------------------|----------------|---------------------|----------------|
| more peripheral (> 0.2 log <sub>2</sub> [EMR-1/GFP]) | 235          | 28.5 %  | 212                 | 90.2 %         | 23                  | 9.7 %          |
| no change (0.2 to -0.2 log <sub>2</sub> [EMR-1/GFP]) | 420          | 50.8 %  | 230                 | 54.7 %         | 190                 | 45.2 %         |
| more central (< -0.2 log <sub>2</sub> [EMR-1/GFP])   | 171          | 20.7 %  | 71                  | 41.5 %         | 100                 | 58.4 %         |

**D** EMR-1 DamID enrichment (10 kb bins) LMN-Y59C over LMN-WT

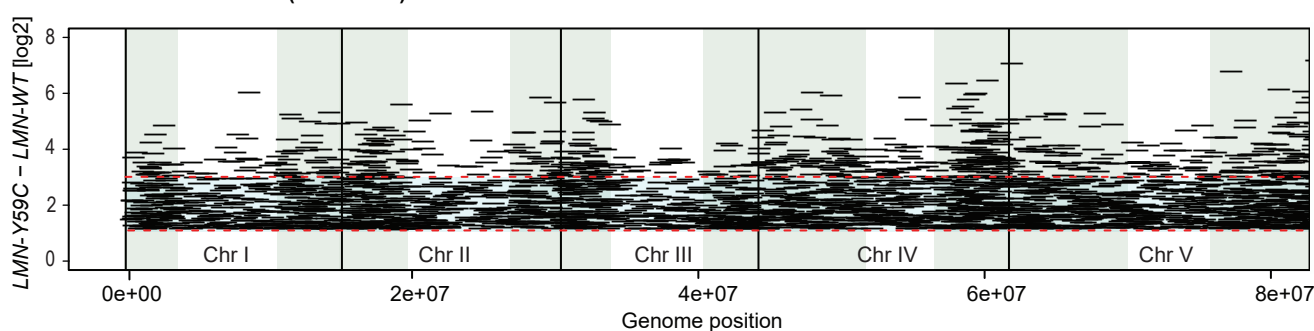

**E** Repeat element enrichment: 10 kb bins

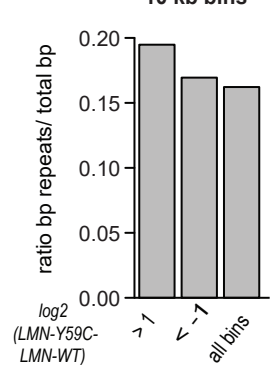

**F** H3K9me enrichment: 10 kb bins

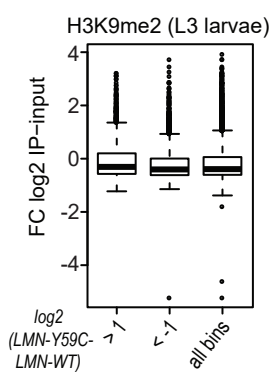

H3K9me enrichment: 10 kb bins

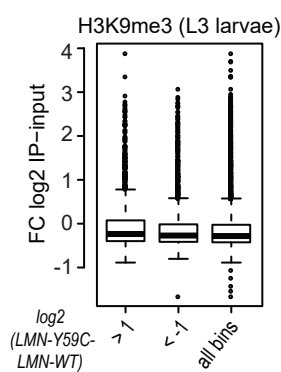

**Figure S1: Controls for muscle-specific EMR-DamID** A) Representative images of LMN-WT (BN403) and LMN-Y59C (BN404) containing strains showing unaltered NE association of emerin despite LMN mutation. Bar = 20  $\mu$ m. B) Mean log- normalized mRNA read counts from RNA-seq data of *lmn-1*, *emr-1* and *lem-2* in WT (N2), *cec-4* $\Delta$  (GW828), *LMN-Y59C* (GW653) and *LMN-Y59C; cec-4* $\Delta$  (GW1468) backgrounds. C) Tables of the absolute values of rolling means of 3 differential DamID log<sub>2</sub> ratios of *LMN-Y59C* - *LMN-WT* based on 100 kb bins. The table shows the percentage of bins in the arms and cores of chromosomes I-V. D) Graphs representing the position of 10 kb bins where the calculation  $\log_2 (LMN-Y59C) - \log_2 (LMN-WT) = >1$ . Red dotted lines indicate thresholds of  $\log_2 (EMR-1/GFP) >1$  and  $>3$ . E) Quantitation of repeat element enrichment in 10 kb regions of *LMN-Y59C* - *LMN-WT* ( $\log_2[EMR-1/GFP] >1$  vs. all 10 kb bins. F) Enrichment levels of H3K9me2 or me3 based on whole L3 larval ChIP-seq in the 10 kb bins of *LMN-Y59C* - *LMN-WT* ( $\log_2 [EMR-1/GFP] >1$  vs. all 10 kb bins.

**A** Transcription factor motif enrichment in genes in differentially positioned regions *LMN-Y59C* vs. *LMN-WT*

■ EFL-2 (E2F) [M0674\_1.02d]    ■ EFL-2 (E2F) [M0675\_1.02d]    ■ EFL-1 (E2F) [M2334\_1.02d]    ■ EFL-1 (E2F) [M4711\_1.02d]

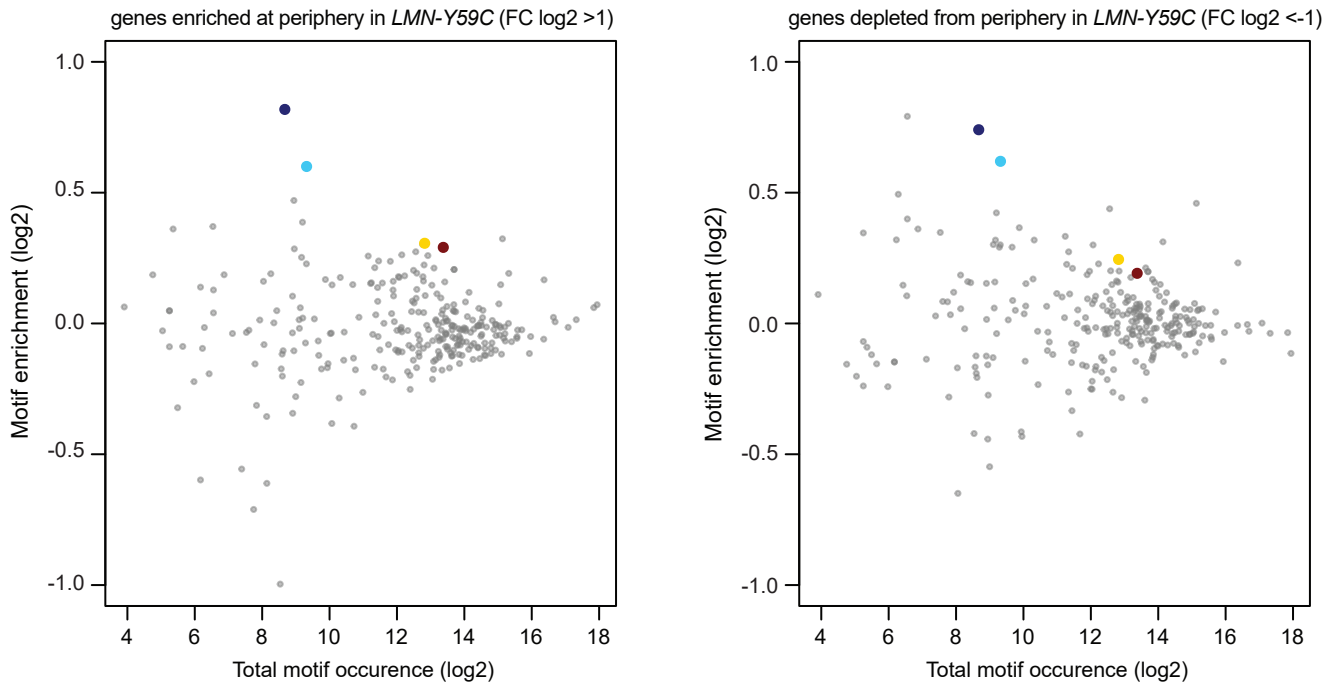**B** Sequence logos of EFL-1 and EFL-2 motifs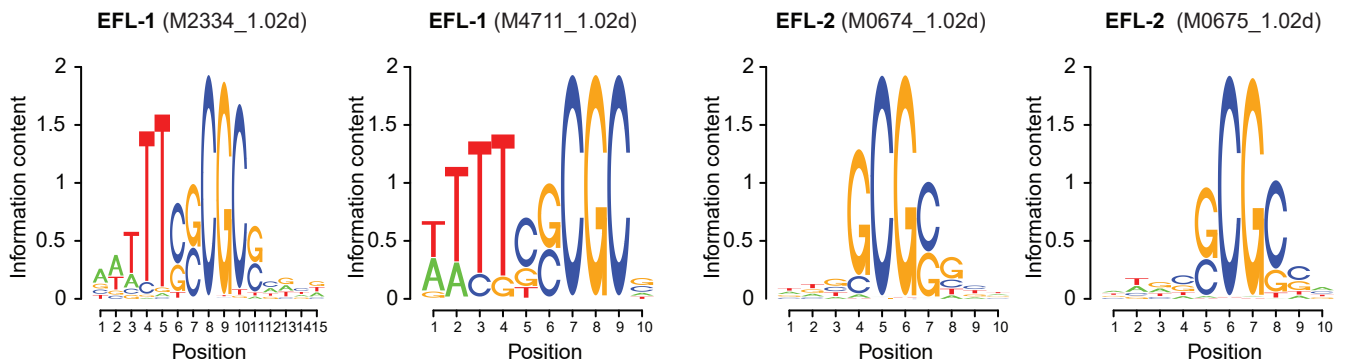

**Figure S2: Genes aberrantly tethered, or released from the nuclear periphery in *LMN-Y59C* are enriched for the binding consensus of the E2F homolog EFL-2.** A) Plot showing enrichment of E2F transcription factor motifs in promoters of genes aberrantly tethered, or released from the nuclear periphery in the *LMN-Y59C* (>2 or <-2 fold change (FC) in log<sub>2</sub> [EMR-1/GFP] in *LMN-Y59C* over *LMN-WT* strains) versus occurrence in the whole genome. (B) Sequence logos showing the motifs recognized by the two E2F homologs, EFL-1 and EFL-2.

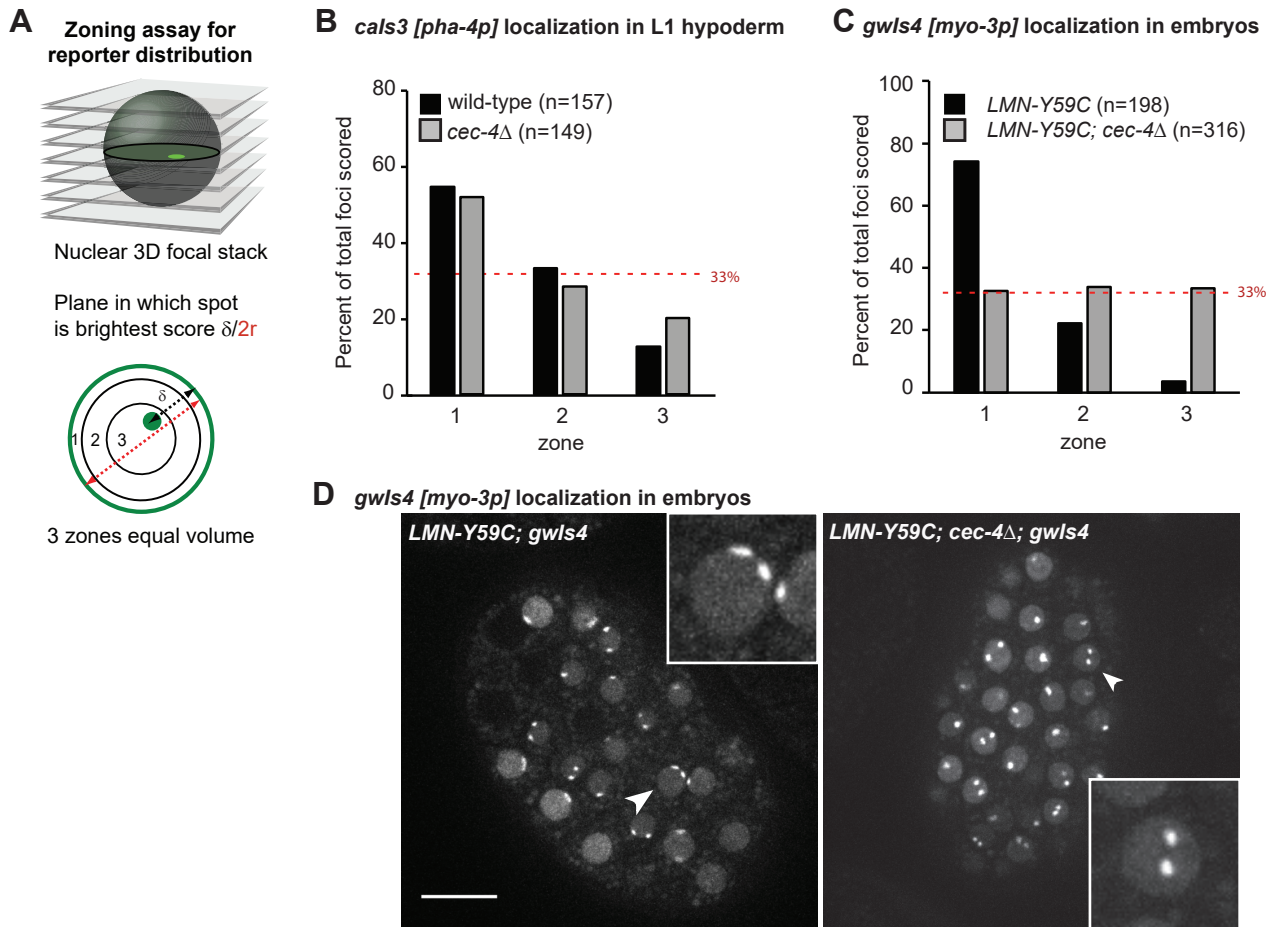

**Figure S3: Loss of CEC-4 does not affect heterochromatin array localization in hypoderm, but releases it in early embryos.** A) The zoning assay for subnuclear GFP-tagged reporter distribution in spherical cell types. B) Quantitation of the *cals3* (*pha-4p* reporter array) position using a zoning assay in hypoderm cells of wildtype or *cec-4*Δ L1 *C. elegans*. Data are from at least two biological replicas. Red dotted line is 33%, representing a random distribution in all three equal zones. C) as B, but quantitation of the *gwls4* *myo-3p* array position using the zoning assay in *C. elegans* early embryos expressing LMN-Y59C in wild type (GW654) or *cec-4*Δ (GW888) backgrounds. D) Confocal fluorescence microscopy of *C. elegans* early embryos (quantified in C) carrying the muscle-specific *gwls4* array and expressing LMN-Y59C in wild-type or *cec-4*Δ backgrounds. Bar = 10  $\mu$ m

**A** Phalloidin-rhodamine labeling of actin

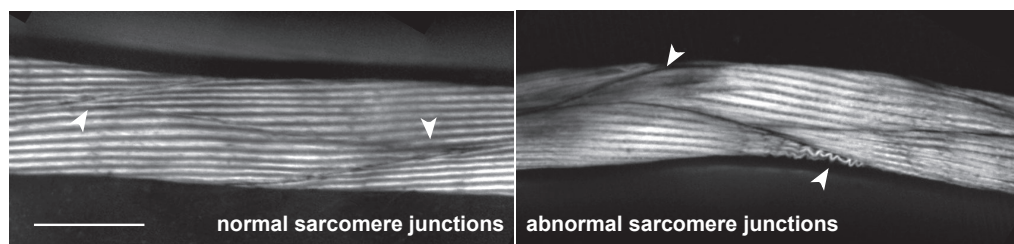

**B** Phalloidin-rhodamine labeling of actin

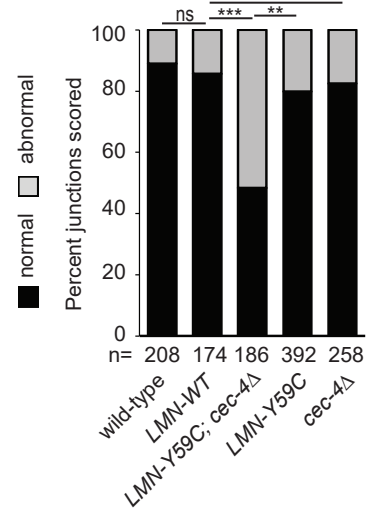

**C** GFP::MYO-3 live imaging

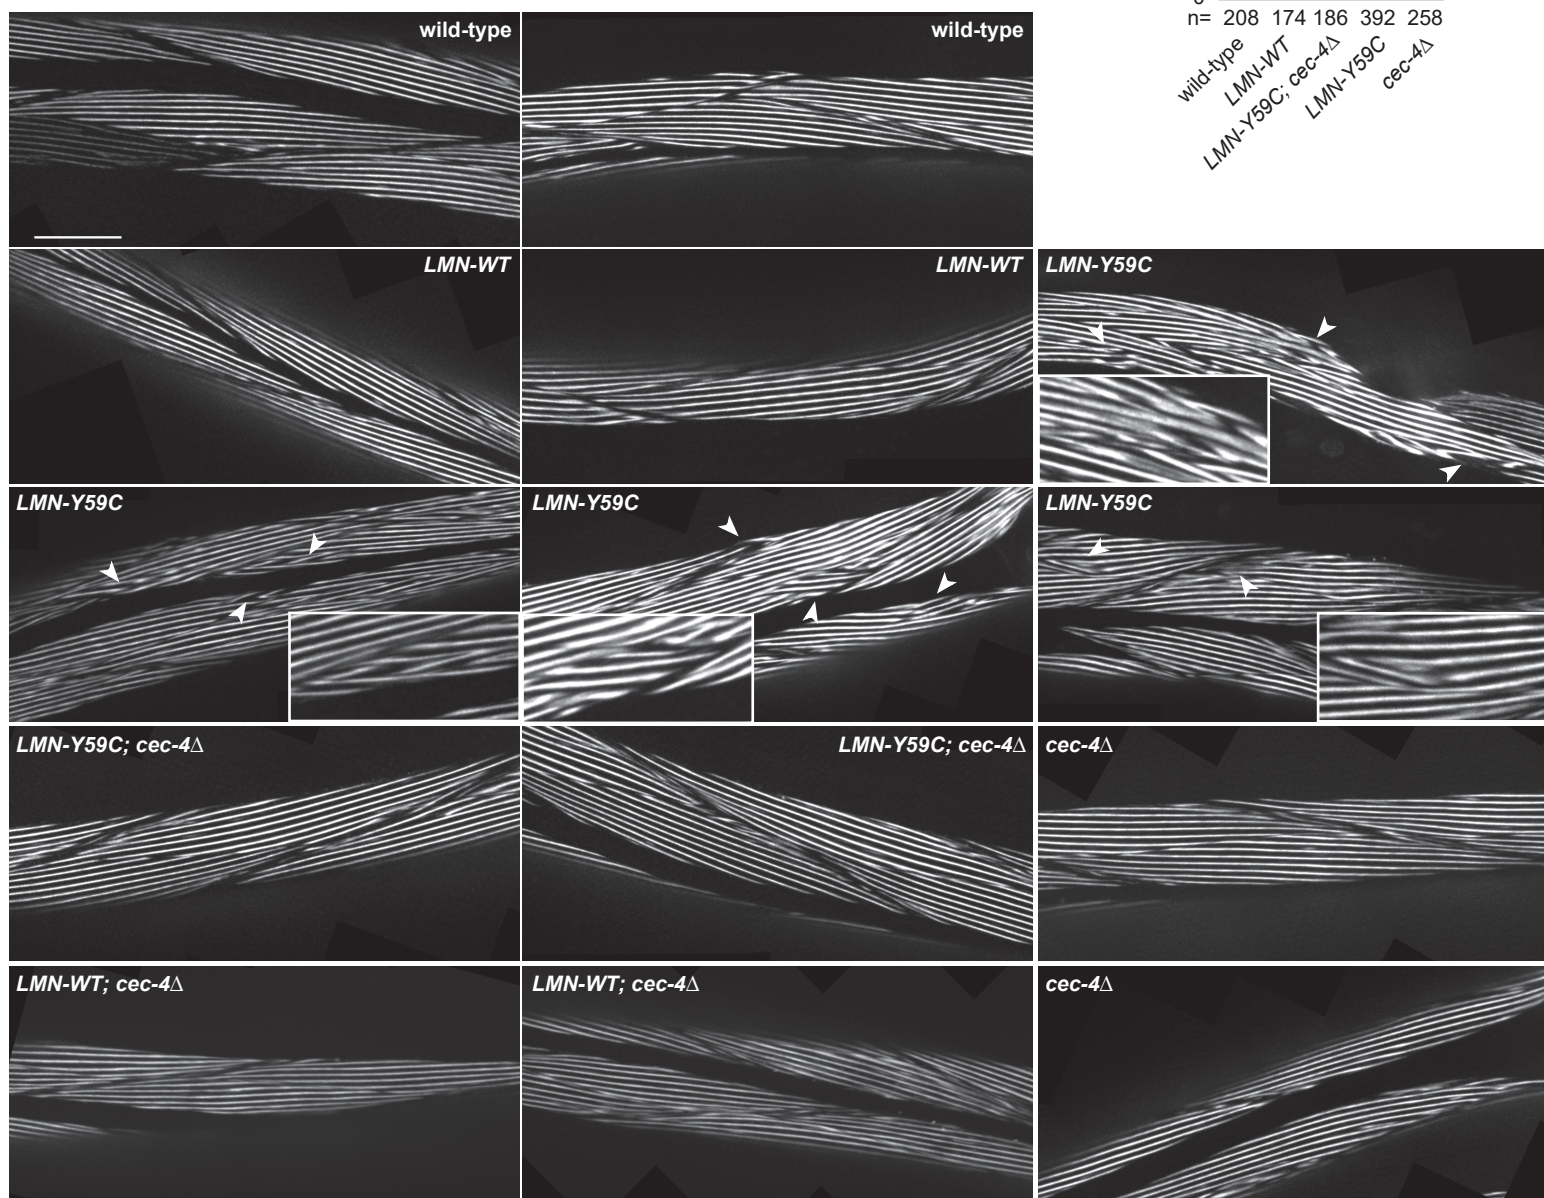

**D** GFP::MYO-3 live

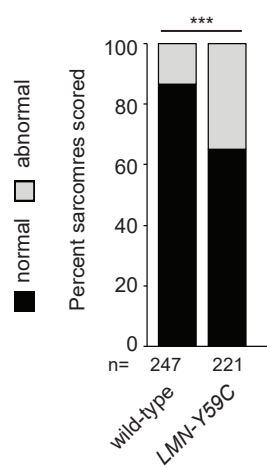

**E** *C. elegans* L4 larval locomotion

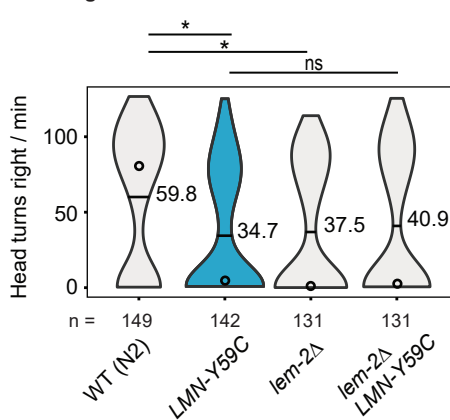

**F** Phalloidin labeling of actin

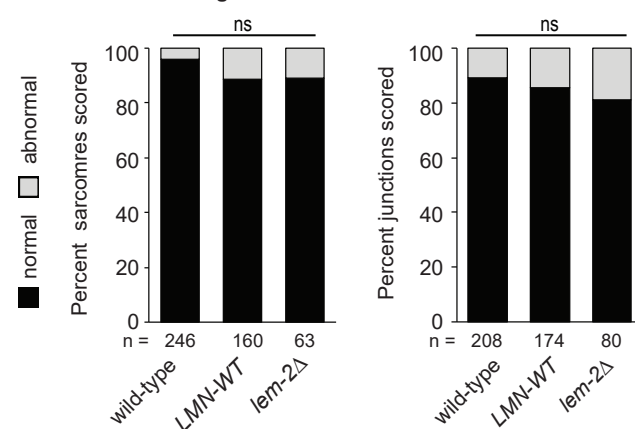

**Figure S4: *LMN-Y59C*-induced abnormal sarcomeres and junctions are suppressed by *cec-4Δ*, but not *lem2Δ*.** A) Representative images of phalloidin-rhodamine staining in L4/young adult *C. elegans*, showing normal and abnormal junctions between sarcomeres (see arrowheads). Bar= 20 μm. B) Quantitation of actin organization according to phalloidin-rhodamine staining in young adults of; wild-type (N2), *cec-4Δ* (GW828), *LMN-WT* (GW655), *LMN-Y59C* (GW653) and *LMN-Y59C; cec-4Δ* (GW1468), scoring for altered junctions between sarcomeres. Data from at least three biological replicas; n=total junctions scored. (\*\*\*) p<0.001 and ns = non-significant (p>0.05), by Chi-squared test. C) Confocal fluorescence live imaging of L4/young adult *C. elegans* expressing GFP::MYO-3, in the following strains: wild-type (RW1596), *cec-4Δ* (GW1491), *LMN-WT* (GW1492), *LMN-WT; cec-4Δ* (GW1493), *LMN-Y59C* (GW1494) and *LMN-Y59C; cec-4Δ* (GW1495). Bar = 20 μm. D) Quantitation of GFP::MYO-3 organization in sarcomeres of L4/young adults. (\*\*\*) p<0.0001, Chi-squared test. E) The deletion of *lem-2* causes defects in swimming assays that are epistatic with *LMN-Y59C*. L4 larvae from wild-type (N2), *LMN-Y59C* (GW653), *lem-2Δ* (GW1214), and *LMN-Y59C; lem-2Δ* (GW1226)) were transferred to liquid, and head bends to the right were counted as described in Materials and Methods. n= worms scored per genotype. Data are presented as violin plots where the horizontal bar indicates the mean and the empty dot indicates the median respectively. Values are taken from at least three independent assays with all genotypes quantified in parallel. (\*) p<0.01 and ns = non-significant (>0.5), by Student's t test. F) Quantitation of sarcomere integrity and junction organization in muscle cells as in panel B, in the indicated strains: wild-type (N2), *LMN-Y59C* (GW653), *lem-2Δ* (GW1214). ns = non-significant by Chi-squared test.

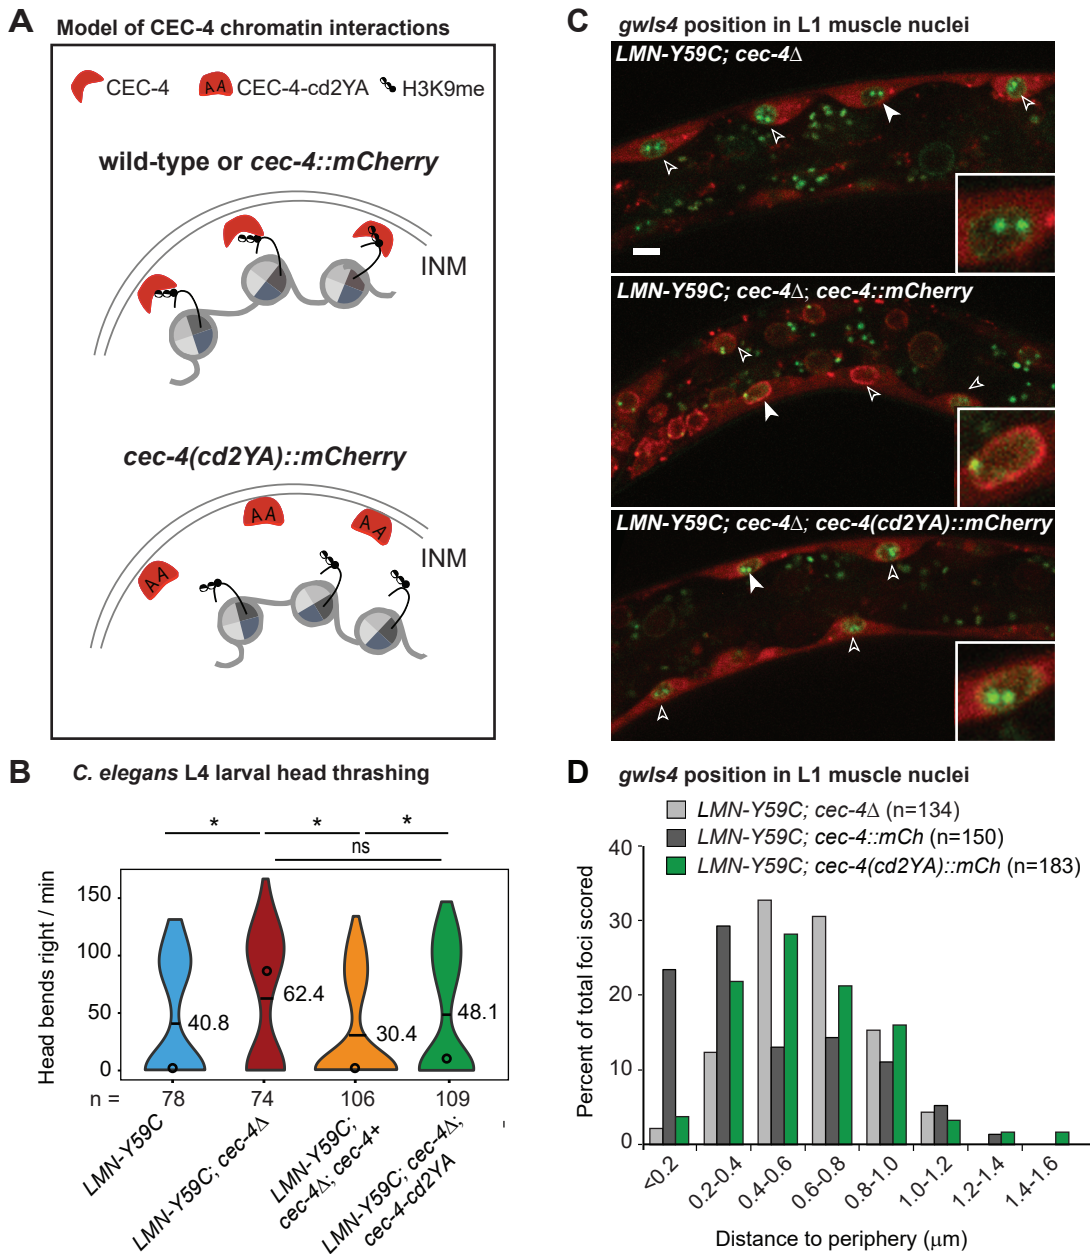

**Figure S5: *LMN-Y59C* induced array sequestration is suppressed by *cec-4Δ* and by the chromodomain deficient *cec-4-CD2YA* mutant.** A) Sketch of CEC-4 interacting with H3K9me<sup>1/2/3</sup> marked chromatin (wild-type, top). The double point mutation (Y87A/Y111A) in the CEC-4 CD releases chromatin from the nuclear periphery (*cec-4-cd2YA::mCherry*, bottom (Gonzalez-Sandoval et al. 2015)). B) Quantitation of head thrashing in strains expressing *LMN-Y59C* and either *cec-4::mCherry* or *cec-4-cd2YA::mCherry*, (hereafter *mCh*) or no *cec-4*. *LMN-Y59C; gwlS4* (GW654), *cec-4Δ; gwlS4* (GW888), *LMN-Y59C; cec-4Δ; CEC-4::mCh*; *gwlS4* (GW1026) and *LMN-Y59C; cec-4Δ; CEC-4(cd2YA)::mCh; gwlS4* (GW1066). n = number of worms scored. (\*) p < 0.01, ns = non-significant (p > 0.5), Student's t test. All genotypes were scored in parallel in three independent assays. C) Representative images of *C. elegans* L1 larvae bearing the muscle-specific *gwlS4* array, expressing *LMN-Y59C* in a *cec-4Δ* background (*LMN-Y59C; cec-4(ok3124); gwlS4* (GW888), to which either *cec-4::mCh* (*cec-4+*; GW1026) or *cec-4(cd2YA)::mCh* is restored (GW1066). Previous work showed that *cec-4::mCh* anchors arrays in embryos like CEC-4, while *cec-4(cd2YA)::mCh* does not (Gonzalez-Sandoval et al. 2015). Filled arrowheads indicate the muscle nuclei enlarged in insets. Images are a single focal plane. Bar = 10 μm. D) Quantitation of the *gwlS4* focus distance from the nuclear envelope (NE) in muscle cells of the strains shown in panel C. The distances measured as nearest radial distance from the focus to the NE. Probability values of *LMN-Y59C; cec-4Δ* vs *LMN-Y59C; cec-4Δ; cec-4::mCh* and *LMN-Y59C; cec-4Δ* vs *LMN-Y59C; cec-4Δ; cec-4(cd2YA)::mCh* are p < 0.0001 and ns (p > 0.05), respectively by Chi-squared tests.



**A** 100 kb bins, absolute values of rolling means of 3 differential DamID log<sub>2</sub> ratios of *LMN-Y59C;cec-4Δ* - *LMN-Y59C*

|                                                      | total # bins | % total | # bins in chr. arms | % in chr. arms | # bins in chr. cores | % in chr. core |
|------------------------------------------------------|--------------|---------|---------------------|----------------|----------------------|----------------|
| more peripheral (>0.2 log <sub>2</sub> [EMR-1/Dam])  | 216          | 26.2 %  | 87                  | 40.2%          | 129                  | 59.7 %         |
| no change (0.2 to -0.2 log <sub>2</sub> [Emr-1/Dam]) | 405          | 49.0 %  | 236                 | 58.2 %         | 169                  | 41.7 %         |
| more central (<-0.2 log <sub>2</sub> [EMR-1/Dam])    | 205          | 24.8 %  | 190                 | 92.6 %         | 15                   | 7.3 %          |

**B** 100 kb bins, absolute values of rolling means of 3 differential DamID log<sub>2</sub> ratios of *LMN-WT;cec-4Δ* - *LMN-WT*

|                                                      | total # bins | % total | # bins in chr. arms | % in chr. arms | # bins in chr. core | % in chr. core |
|------------------------------------------------------|--------------|---------|---------------------|----------------|---------------------|----------------|
| more peripheral (>0.2 log <sub>2</sub> [EMR-1/Dam])  | 166          | 20.1 %  | 111                 | 66.8 %         | 55                  | 33.1 %         |
| no change (0.2 to -0.2 log <sub>2</sub> [EMR-1/Dam]) | 558          | 67.6 %  | 320                 | 57.3 %         | 238                 | 42.6 %         |
| more central (<-0.2 log <sub>2</sub> [EMR-1/GFP])    | 102          | 12.3 %  | 82                  | 80.3 %         | 20                  | 19.6 %         |

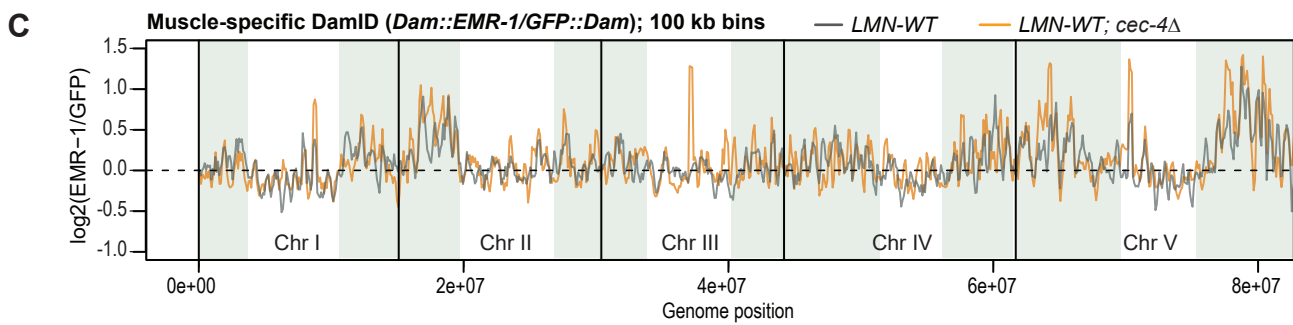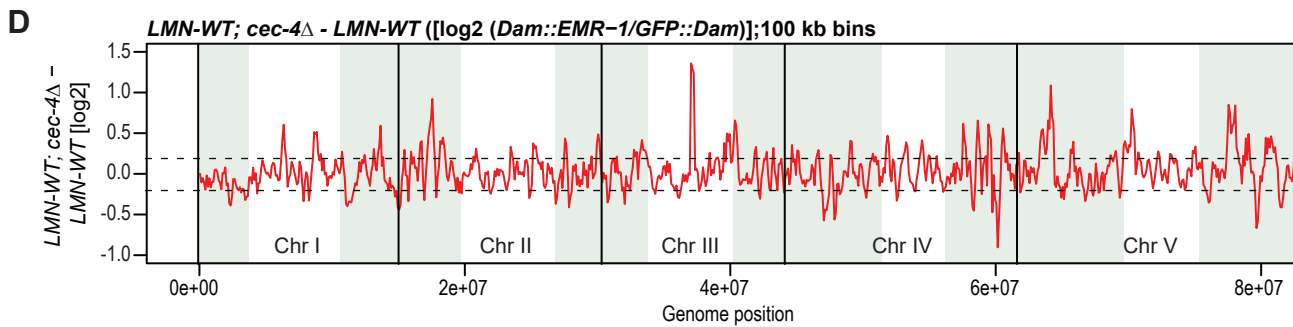

**E** Repeat element enrichment: 10 kb bins (*EMR-1/GFP*)

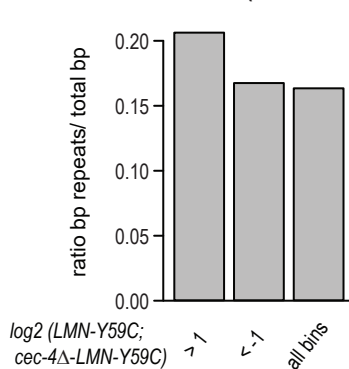

**F** H3K9me modification enrichment: 10 kb bins (*EMR-1/GFP*)

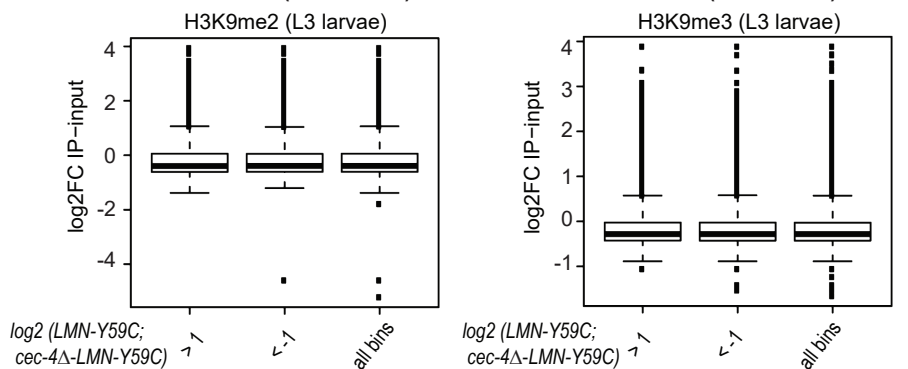

**Figure S6: Loss of CEC-4 significantly changes chromatin position in the *LMN-Y59C*, but not the *LMN-WT* background.** A) Table of 100 kb bins of the absolute values of rolling means of 3 differential DamID log<sub>2</sub> ratios of *LMN-Y59C; cec-4Δ* - *LMN-Y59C* showing the percent of bins in the arms and cores of chromosomes I-V. B) Table of 100 kb bins of the absolute values of rolling means of 3 differential DamID log<sub>2</sub> ratios of *LMN-WT; cec-4Δ* - *LMN-WT* showing the percent of bins in the arms and cores of chromosomes I-V. C) Line plot of log<sub>2</sub> (EMR-1::Dam/GFP::Dam) in *LMN-WT* and *LMN-WT; cec-4Δ*, L4/young adult *C. elegans* muscle for all autosomes. The signals are averaged over 3 sliding 100 kb windows. Chromosome arms are shaded in light green. Dotted line indicates zero log<sub>2</sub> ratio. D) Line plot of *LMN-WT; cec-4Δ* - *LMN-WT* (log<sub>2</sub>) showing the differential association of EMR-1 in the *cec-4Δ* mutant strain compared to *LMN-WT*. Chromosome arms are shaded in light green. Dotted lines indicate 0.2 and -0.2 thresholds. E) Quantification of the number of base pair (bp) with a repetitive element over the total number of bp in each category (*LMN-Y59C* up [ $>1 \log_2(\text{EMR-1/GFP})$ ], *LMN-Y59C* down [ $<-1 \log_2(\text{EMR-1/GFP})$ ] and the whole genome. F) As Figure S1E for 10 kb bins of *LMN-Y59C; cec-4Δ* - *LMN-Y59C* ( $\log_2 [\text{EMR-1/GFP}] \log_2 >1$  or  $<-1$  vs. all 10 kb bins).

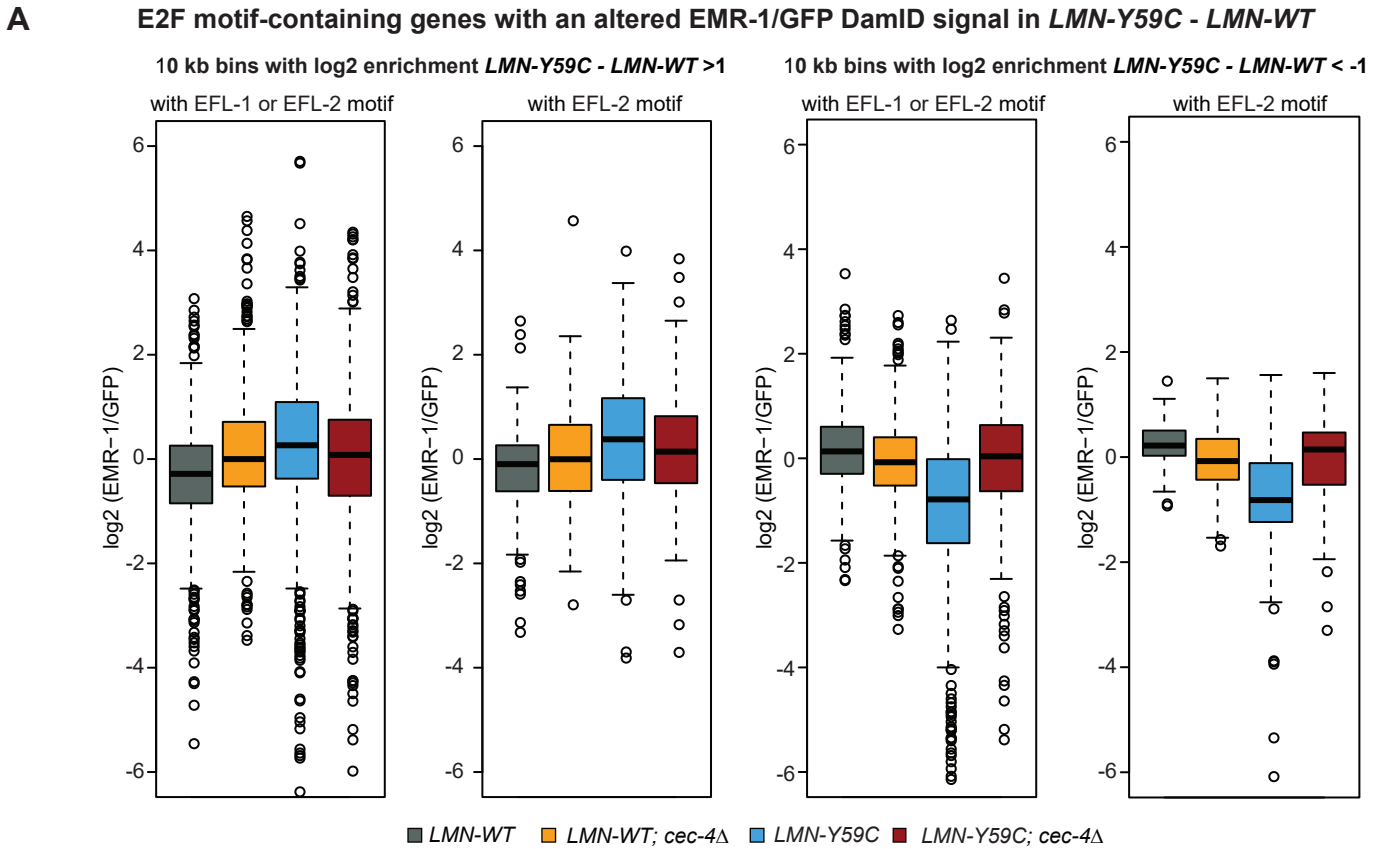

**B** TF motif enrichment *LMN-Y59C;cec-4*Δ - *LMN-Y59C*

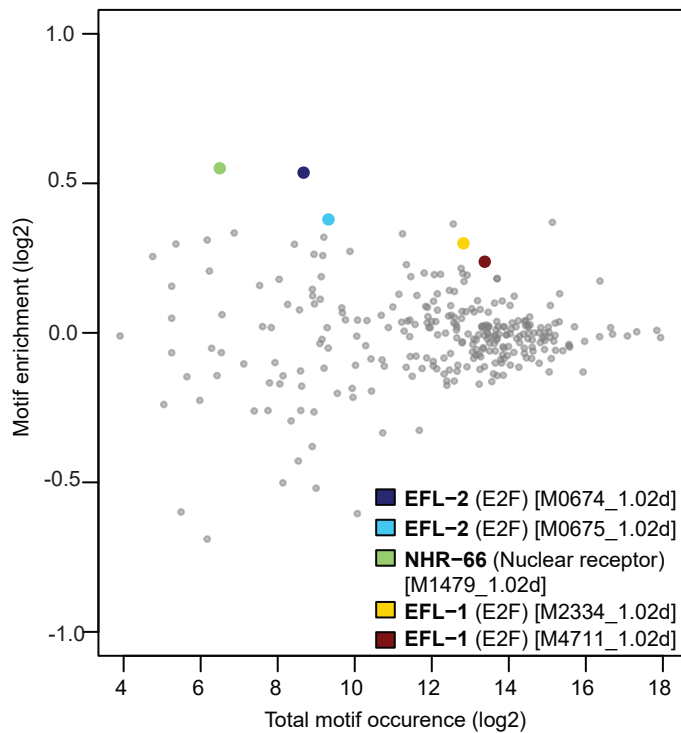

**C** TF motif enrichment in muscle-expressed genes

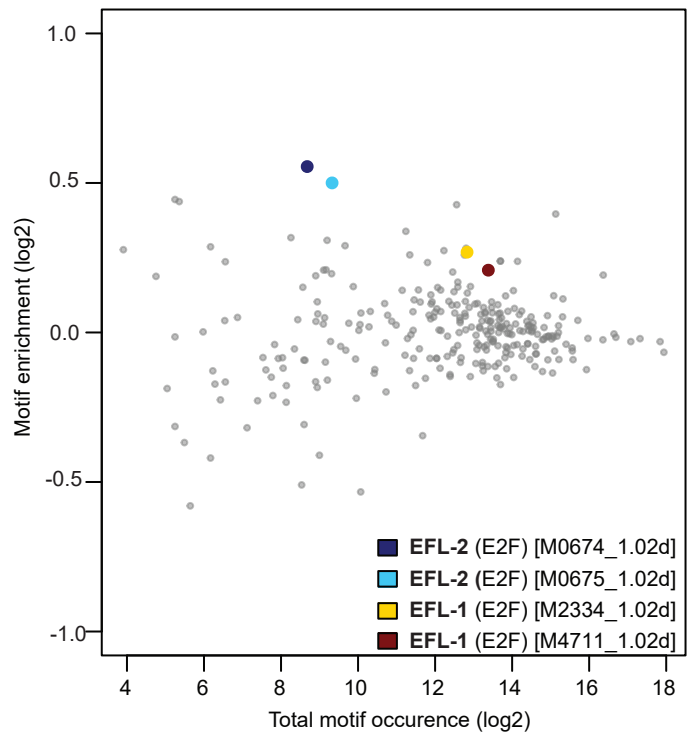

**Figure S7: Genes containing EFL-2 motifs that are aberrantly tethered or released from the INM in *LMN-Y59C* muscle are rescued by *LMN-Y59C*; *cec-4Δ*.** A) Boxplot showing the log<sub>2</sub> fold change (FC) in EMR-1/GFP based on 10 kb bins in the indicated genotypes for genes containing a EFL-2 motifs or either EFL-2 or EFL-1 motifs. Bins scored show enhanced tethering or release from the nuclear periphery in *LMN-Y59C* vs *LMN-WT* (log<sub>2</sub> >1 or <-1). B) Plot showing enrichment of E2F transcription factor motifs in promoters of genes from *cec-4* sensitive sequences (*LMN-Y59C*; *cec-4Δ* – *LMN-Y59C*, >0.2 or <-0.2 FC log<sub>2</sub> [EMR-1/GFP]) versus occurrence in the whole genome. C) Plot showing enrichment of E2F transcription factor motifs in promoters of muscle-expressed genes (i.e., genes expressed in *myo-2* and *myo-3* expressing cells) versus occurrence in the whole genome.

**Table S1:** 97 genes with differential transcript abundances : 'LMN-Y59C' vs 'WT'

Genes meeting significance criteria (FDR < 0.01) and (FC > 1.5), specified by the following five tab-delimited columns: Wormbase 'GeneID', the primary gene name or sequence name as extracted from Wormbase release 273 (Nov-1 2019) in 'gene name', the fold-changes of log<sub>2</sub> expression values of a first replicate sample pair in 'FC\_log2\_repl\_a', the fold-changes of log<sub>2</sub> expression values of second replicate sample pair in 'FC\_log2\_repl\_b' (Figure 7A), and the p-values for differential expression multiplicity corrected by the Benjamini-Hochberg method in 'FDR'.

| #GeneID        | gene name | FC_log2_repl_a | FC_log2_repl_b | FDR         |
|----------------|-----------|----------------|----------------|-------------|
| WBGene00005016 | sqt-1     | -2.929635629   | -1.607179923   | 3.30E-07    |
| WBGene00015236 | B0511.11  | 0.633438216    | 1.122141695    | 0.000416933 |
| WBGene00015230 | tag-344   | 1.113000491    | 0.914598375    | 0.008506665 |
| WBGene00005017 | sqt-2     | -2.226775253   | -1.496199671   | 4.18E-10    |
| WBGene00044658 | C01G10.17 | 0.70756948     | 0.748238635    | 0.006985979 |
| WBGene00007231 | C01G10.4  | 1.550408288    | 0.628462708    | 0.001360242 |
| WBGene00015339 | C02E7.6   | -1.597870706   | -1.038311007   | 0.000142131 |
| WBGene00007404 | best-5    | -1.033740567   | -0.980482313   | 1.59E-09    |
| WBGene00004932 | sod-3     | 1.28993283     | 0.668974716    | 0.007733759 |
| WBGene00015642 | C09E7.8   | 0.927714841    | 0.683926262    | 1.63E-05    |
| WBGene00007484 | C09G1.2   | -1.678285516   | -0.683286465   | 0.000907777 |
| WBGene00000665 | col-90    | -2.625150205   | -1.386176352   | 1.14E-08    |
| WBGene00016667 | C45E5.4   | 1.273016934    | 0.602318844    | 5.98E-09    |
| WBGene00016970 | C56E6.2   | 0.961299442    | 0.604204556    | 1.63E-06    |
| WBGene00008390 | D1086.3   | -1.163989958   | -0.917173549   | 0.000169926 |
| WBGene00001864 | him-5     | -1.413766679   | -0.655983632   | 3.51E-05    |
| WBGene00008392 | D1086.5   | -1.333018636   | -0.775010773   | 1.36E-08    |
| WBGene00008425 | D2045.8   | -1.302448525   | -0.690538447   | 6.73E-09    |
| WBGene00001158 | ech-9     | -2.161196813   | -0.792875419   | 0.000799176 |
| WBGene00017305 | ns pb-12  | -1.909527393   | -0.654624801   | 0.002770432 |
| WBGene00000606 | col-17    | -2.694557575   | -1.329917085   | 1.47E-07    |
| WBGene00000649 | col-73    | -1.540711087   | -1.439767633   | 4.50E-07    |
| WBGene00000702 | col-128   | -1.101399436   | -0.999362778   | 0.000383055 |
| WBGene00045207 | F13E9.14  | 1.279054602    | 0.949203904    | 1.27E-06    |
| WBGene00008816 | F14F8.8   | 1.750918948    | 0.970867683    | 1.48E-11    |
| WBGene00003099 | lys-10    | 0.746369523    | 0.904206337    | 0.007028456 |
| WBGene00017717 | F22F4.4   | 0.840488267    | 0.766576986    | 0.002352455 |
| WBGene00005018 | sqt-3     | -2.440491213   | -1.533413751   | 1.60E-12    |
| WBGene00001067 | dpy-5     | -2.522815368   | -1.959014444   | 2.61E-16    |
| WBGene00003079 | lsm-5     | 1.504614269    | 1.433013081    | 1.34E-76    |
| WBGene00009222 | fbxa-95   | 1.199188813    | 1.263198915    | 3.72E-10    |
| WBGene00001074 | dpy-13    | -2.194050498   | -1.108307233   | 2.17E-06    |
| WBGene00017937 | F30H5.3   | -1.802625934   | -1.168280929   | 1.36E-05    |
| WBGene00009384 | piit-1    | 1.436386638    | 0.761660059    | 5.98E-09    |

|                |            |              |              |             |
|----------------|------------|--------------|--------------|-------------|
| WBGene00009386 | tag-290    | 1.157588536  | 0.679279411  | 2.50E-09    |
| WBGene00018297 | F41F3.3    | -2.374655273 | -0.864199413 | 4.72E-06    |
| WBGene00018335 | F42A9.6    | 0.651037168  | 0.598370511  | 0.006214941 |
| WBGene00005702 | sru-39     | 1.107344512  | 1.104066667  | 0.003224704 |
| WBGene00009983 | cut-2      | -0.992976557 | -0.937015371 | 0.004229825 |
| WBGene00010125 | dod-22     | -0.7126715   | -0.609028726 | 0.00897761  |
| WBGene00000678 | col-104    | -1.299340145 | -0.651850707 | 0.002839366 |
| WBGene00000675 | col-101    | 0.728558126  | 0.996653859  | 0.001864579 |
| WBGene00003522 | nas-3      | -2.019947677 | -1.14820081  | 1.52E-09    |
| WBGene00019608 | ani-2      | 1.596984618  | 1.291693261  | 2.56E-31    |
| WBGene00006678 | twk-25     | 1.766836774  | 0.641878327  | 3.69E-05    |
| WBGene00006843 | unc-119    | 0.861648662  | 0.842897625  | 7.90E-23    |
| WBGene00000653 | col-77     | -1.604701959 | -0.679425574 | 2.16E-06    |
| WBGene00010958 | ndfl-4     | -1.169988455 | -0.891981701 | 1.56E-10    |
| WBGene00010996 | R03G8.1    | 2.873251632  | 2.850023383  | 1.07E-23    |
| WBGene00011105 | R07E3.4    | 1.023470666  | 0.831912189  | 3.98E-10    |
| WBGene00011107 | R07E3.6    | -1.214009935 | -1.053741891 | 0.000615543 |
| WBGene00011166 | chil-22    | 0.59773076   | 0.594391248  | 0.000191214 |
| WBGene00011244 | R11D1.3    | 0.657647011  | 1.234335905  | 2.17E-06    |
| WBGene00020033 | R12E2.7    | -1.42476644  | -0.823948278 | 0.000136731 |
| WBGene00011254 | R12G8.1    | 1.049393674  | 0.65035201   | 0.00069061  |
| WBGene00011262 | pho-8      | 0.795999953  | 0.755644744  | 1.14E-07    |
| WBGene00001703 | grd-14     | -1.426217871 | -0.768858962 | 0.000871986 |
| WBGene00004397 | rol-6      | -3.092764376 | -2.232549737 | 2.07E-20    |
| WBGene00011340 | ugt-30     | 0.697002251  | 0.615555573  | 0.003733436 |
| WBGene00006539 | tbb-6      | 0.894755773  | 0.936588153  | 4.12E-07    |
| WBGene00004264 | qua-1      | -0.667646359 | -1.003289802 | 0.005848366 |
| WBGene00011493 | T05F1.8    | 1.117214378  | 0.708538509  | 0.001510308 |
| WBGene00000618 | col-41     | -2.750996739 | -2.793667973 | 2.29E-16    |
| WBGene00000715 | col-142    | 1.432092486  | 1.230422607  | 1.83E-06    |
| WBGene00020550 | T17H7.1    | -1.709626613 | -0.694429421 | 0.003968435 |
| WBGene00020672 | T22B7.3    | 0.626586302  | 1.159028666  | 0.001482062 |
| WBGene00006580 | tlp-1      | 1.480757271  | 1.397247769  | 2.38E-76    |
| WBGene00012186 | mlt-11     | -2.86502476  | -1.450413049 | 3.80E-07    |
| WBGene00004156 | pqn-74     | -1.003963393 | -0.68891031  | 6.47E-09    |
| WBGene00001397 | fat-5      | 1.291739256  | 1.119019514  | 3.89E-15    |
| WBGene00001446 | flp-3      | 0.929822671  | 0.92832234   | 1.54E-33    |
| WBGene00022415 | Y102A11A.5 | -1.263161256 | -0.923328151 | 0.001067267 |
| WBGene00044213 | Y102A5C.36 | -1.120313175 | -0.895801858 | 0.000878448 |
| WBGene00013748 | ssu-1      | 1.207688949  | 0.596238451  | 0.003194755 |
| WBGene00044754 | Y119C1B.12 | 2.004118858  | 0.877313069  | 2.16E-06    |
| WBGene00021397 | Y38C1AA.6  | -1.014250211 | -0.601172524 | 0.000509498 |
| WBGene00012682 | asp-16     | 1.635731338  | 1.850660605  | 2.88E-08    |

|                       |           |              |              |             |
|-----------------------|-----------|--------------|--------------|-------------|
| <b>WBGene00000671</b> | col-96    | 0.721791605  | 1.433285453  | 0.007088563 |
| <b>WBGene00012770</b> | srt-47    | -1.538976977 | -1.00221045  | 0.002352455 |
| <b>WBGene00001066</b> | dpy-4     | -2.662614875 | -1.721999398 | 2.18E-12    |
| <b>WBGene00012840</b> | grsp-1    | 0.720219084  | 0.63526954   | 5.42E-05    |
| <b>WBGene00012910</b> | Y46G5A.20 | 1.026196883  | 1.021682699  | 0.00058196  |
| <b>WBGene00002018</b> | hsp-16.41 | 1.046641502  | 0.664935302  | 3.21E-13    |
| <b>WBGene00021624</b> | Y47D7A.12 | 0.971227881  | 0.707848968  | 3.73E-05    |
| <b>WBGene00021731</b> | Y49G5A.1  | 0.911907885  | 1.307236846  | 0.002584493 |
| <b>WBGene00013073</b> | hmit-1.1  | -1.109657576 | -0.984678515 | 6.83E-11    |
| <b>WBGene00013074</b> | hmit-1.2  | -0.88659535  | -0.678811568 | 0.000489083 |
| <b>WBGene00013146</b> | Y53C12B.7 | -1.115003697 | -0.834937623 | 9.39E-10    |
| <b>WBGene00013207</b> | zipt-2.3  | 0.959418241  | 0.625776275  | 0.001050618 |
| <b>WBGene00021977</b> | Y58A7A.3  | 0.681909293  | 1.162287036  | 3.35E-06    |
| <b>WBGene00001725</b> | grl-16    | -2.332350454 | -0.891931807 | 0.000148562 |
| <b>WBGene00022181</b> | pho-9     | -1.053053962 | -0.630300176 | 1.85E-05    |
| <b>WBGene00045305</b> | ZC250.4   | 1.087230462  | 0.60623385   | 4.74E-05    |
| <b>WBGene00000749</b> | col-176   | 0.876720354  | 1.221856909  | 1.05E-07    |
| <b>WBGene00006956</b> | wrt-10    | -2.226775253 | -0.814139956 | 0.000290943 |
| <b>WBGene00022679</b> | ZK180.5   | -1.900584944 | -1.048806166 | 4.85E-08    |
| <b>WBGene00002087</b> | ins-4     | -0.953001316 | -0.886647805 | 3.73E-05    |

**Table S2:** 118 genes with differential transcript abundance: 'LMN-Y59C; cec-4Δ' vs 'LMN-Y59C'

Genes meeting significance criteria (FDR < 0.01) and (FC > 1.5), specified by the following five tab-delimited columns: Wormbase 'GeneID', the primary gene name or sequence name as extracted from Wormbase release 273 (Nov-1 2019) in 'gene name', the fold-changes of log2 expression values of a first replicate sample pair in 'FC\_log2\_repl\_a', the fold-changes of log2 expression values of second replicate sample pair in 'FC\_log2\_repl\_b' (see Figure 7A), and the p-values for differential expression multiplicity corrected by the Benjamini-Hochberg method in 'FDR'

| #GeneID        | gene name | FC_log2_repl_a | FC_log2_repl_b | FDR         |
|----------------|-----------|----------------|----------------|-------------|
| WBGene00005016 | sqt-1     | 3.062803781    | 1.396039308    | 6.64E-05    |
| WBGene00005017 | sqt-2     | 2.285299011    | 1.488269169    | 2.31E-10    |
| WBGene00044658 | C01G10.17 | -0.776487961   | -0.934996607   | 0.000400198 |
| WBGene00003096 | lys-7     | -1.588759491   | -1.285905517   | 2.85E-51    |
| WBGene00015399 | cyp-35A1  | 0.811691313    | 0.903133717    | 0.006707422 |
| WBGene00015479 | wht-1     | 1.199979826    | 0.730397531    | 0.001619813 |
| WBGene00007362 | cyp-35C1  | 1.008099227    | 0.709733421    | 2.30E-07    |
| WBGene00015574 | irg-1     | -1.085108631   | -0.734399054   | 0.001855403 |
| WBGene00003862 | old-1     | -0.593247921   | -0.621785477   | 0.004232981 |
| WBGene00015660 | catp-3    | -0.761131775   | -0.687778832   | 1.35E-06    |
| WBGene00002026 | hsp-70    | -1.065036156   | -0.6411195     | 0.006754214 |
| WBGene00015889 | C17C3.3   | 1.770038948    | 1.13205584     | 1.29E-05    |
| WBGene00007672 | fbxa-136  | -0.768759716   | -0.820898567   | 0.00724604  |
| WBGene00005832 | srw-85    | 4.563936689    | 4.541186091    | 7.60E-253   |
| WBGene00007876 | dct-19    | -1.320297252   | -1.515979068   | 1.18E-14    |
| WBGene00003528 | nas-9     | -0.727762797   | -0.618964236   | 0.000165996 |
| WBGene00016596 | C42D4.3   | -1.036783701   | -1.142504058   | 3.94E-10    |
| WBGene00016628 | slc-36.5  | 0.626236347    | 0.618052307    | 3.21E-05    |
| WBGene00016659 | C45B2.2   | -0.760261164   | -0.71567167    | 0.00254962  |
| WBGene00016782 | phat-3    | -0.783945402   | -0.591504332   | 0.001114104 |
| WBGene00000781 | cpr-1     | -0.84121641    | -0.619840336   | 4.33E-16    |
| WBGene00006310 | sul-3     | -0.6794118     | -0.685366261   | 2.13E-05    |
| WBGene00016943 | acdh-1    | 3.16492565     | 3.160117765    | 2.14E-81    |
| WBGene00004258 | pyc-1     | 0.736688072    | 0.617452936    | 0.006754214 |
| WBGene00008425 | D2045.8   | 0.661674808    | 0.632749509    | 0.000237255 |
| WBGene00017092 | E02C12.6  | -1.25045798    | -0.587459183   | 0.002129484 |
| WBGene00008477 | clec-17   | -0.807780028   | -0.605022511   | 3.07E-06    |
| WBGene00017128 | E04F6.9   | -0.739027352   | -0.827622585   | 1.37E-07    |
| WBGene00000704 | col-130   | -0.716172302   | -1.214673276   | 0.001008521 |
| WBGene00008584 | irg-4     | 0.744883006    | 0.589163148    | 0.000410498 |
| WBGene00008621 | F09C8.1   | -1.351618137   | -1.107945992   | 6.14E-10    |
| WBGene00000606 | col-17    | 2.206529522    | 1.454346057    | 1.79E-08    |



|                       |           |              |              |             |
|-----------------------|-----------|--------------|--------------|-------------|
| <b>WBGene00000649</b> | col-73    | 0.998135474  | 1.090297863  | 0.000286311 |
| <b>WBGene00008816</b> | F14F8.8   | -1.515889622 | -1.323529738 | 3.80E-10    |
| <b>WBGene00017469</b> | F14F9.6   | -0.929426678 | -0.595372032 | 0.001285025 |
| <b>WBGene00000562</b> | cng-1     | -0.630623825 | -0.694401408 | 0.00043877  |
| <b>WBGene00017501</b> | pud-3     | -1.474528558 | -1.602509466 | 0.00043877  |
| <b>WBGene00008891</b> | clec-42   | -0.92834055  | -0.849187089 | 7.64E-13    |
| <b>WBGene00008897</b> | F16H6.7   | -0.652658909 | -1.254827546 | 0.004575406 |
| <b>WBGene00003099</b> | lys-10    | -1.148415596 | -0.929076722 | 4.04E-05    |
| <b>WBGene00006733</b> | ufd-1     | 0.603707993  | 0.719011971  | 7.99E-14    |
| <b>WBGene00008985</b> | F20G2.1   | -0.752607165 | -0.666139399 | 0.00013768  |
| <b>WBGene00017658</b> | F21C10.9  | 0.963882666  | 0.634290305  | 0.000239706 |
| <b>WBGene00017678</b> | asp-12    | 0.925589649  | 0.706258452  | 6.19E-16    |
| <b>WBGene00005018</b> | sqt-3     | 2.226578087  | 1.5849746    | 7.16E-12    |
| <b>WBGene00017784</b> | F25E5.3   | -0.736649458 | -1.215785664 | 0.00849869  |
| <b>WBGene00001067</b> | dpy-5     | 2.325929137  | 1.482561198  | 2.36E-09    |
| <b>WBGene00005003</b> | spp-18    | -0.915963028 | -0.826082161 | 8.19E-12    |
| <b>WBGene00003079</b> | lsm-5     | -0.941982888 | -1.088837959 | 9.53E-24    |
| <b>WBGene00009222</b> | fbxa-95   | -0.811447212 | -0.928947721 | 1.28E-05    |
| <b>WBGene00017937</b> | F30H5.3   | 1.845431479  | 1.359379139  | 4.15E-07    |
| <b>WBGene00017959</b> | ugt-42    | -0.999774395 | -0.635113611 | 0.00711571  |
| <b>WBGene00000788</b> | cpz-1     | 0.797605013  | 0.750065193  | 0.003626511 |
| <b>WBGene00017990</b> | cec-4     | -1.490054738 | -1.432305099 | 2.60E-26    |
| <b>WBGene00009384</b> | piit-1    | -1.109261629 | -1.169271692 | 2.72E-25    |
| <b>WBGene00009386</b> | tag-290   | -0.832454552 | -0.708859532 | 4.67E-08    |
| <b>WBGene00002012</b> | hsp-12.3  | -1.203824122 | -1.059612657 | 4.04E-05    |
| <b>WBGene00009628</b> | tatn-1    | -0.891886248 | -0.774669169 | 4.48E-14    |
| <b>WBGene00018400</b> | F43H9.4   | -1.069221871 | -0.762613727 | 8.56E-10    |
| <b>WBGene00009773</b> | lipl-2    | -0.667593154 | -0.620745729 | 0.000216933 |
| <b>WBGene00018539</b> | nhr-185   | 1.511048218  | 0.743602418  | 0.002818885 |
| <b>WBGene00009835</b> | F47H4.2   | -0.665674638 | -0.66520501  | 0.008307174 |
| <b>WBGene00009855</b> | clec-22   | 1.141698196  | 1.22302363   | 0.000508977 |
| <b>WBGene00018877</b> | aman-1    | -0.820602629 | -0.965130755 | 0.000620576 |
| <b>WBGene00010124</b> | F55G11.4  | -1.008230936 | -1.303721931 | 1.87E-28    |
| <b>WBGene00010181</b> | F57A8.6   | -1.382966959 | -0.800449343 | 0.003330326 |
| <b>WBGene00019154</b> | glf-1     | 1.244900534  | 1.699136363  | 0.002402181 |
| <b>WBGene00044109</b> | K02E11.10 | 1.521129486  | 0.702499902  | 0.000811645 |
| <b>WBGene00000641</b> | col-65    | -0.905028879 | -0.604072614 | 0.001346498 |
| <b>WBGene00019565</b> | cyp-35A3  | 1.103848083  | 0.896002937  | 0.000102258 |
| <b>WBGene00010760</b> | K10H10.4  | -0.761932031 | -0.96818578  | 0.004715514 |
| <b>WBGene00019730</b> | asns-2    | 1.295798846  | 0.928181293  | 2.01E-15    |
| <b>WBGene00010931</b> | M162.5    | -1.07284764  | -0.717334126 | 0.008646851 |
| <b>WBGene00010996</b> | R03G8.1   | 1.708135074  | 1.073837095  | 3.95E-06    |
| <b>WBGene00019909</b> | R06A10.1  | -1.128661079 | -0.767222612 | 0.000280175 |

|                       |            |              |              |             |
|-----------------------|------------|--------------|--------------|-------------|
| <b>WBGene00002270</b> | lec-7      | -0.732308909 | -0.595224024 | 0.000165996 |
| <b>WBGene00019963</b> | R08E5.3    | -1.01189493  | -0.830930011 | 1.93E-08    |
| <b>WBGene00019970</b> | R08F11.7   | -1.301791563 | -1.029729018 | 4.31E-09    |
| <b>WBGene00044900</b> | cnc-11     | -1.187334549 | -0.766177585 | 0.004766384 |
| <b>WBGene00004397</b> | rol-6      | 2.700779222  | 1.862226069  | 4.48E-14    |
| <b>WBGene00011364</b> | cest-1.2   | 1.125879038  | 0.860882529  | 4.33E-08    |
| <b>WBGene00020242</b> | phat-5     | -1.497173417 | -0.830718437 | 8.12E-06    |
| <b>WBGene00011521</b> | T06C12.14  | -1.057213058 | -0.678706913 | 5.03E-07    |
| <b>WBGene00011548</b> | T06G6.6    | 0.805756904  | 0.702499902  | 0.008466948 |
| <b>WBGene00020309</b> | T07D3.6    | -0.925920525 | -1.034083359 | 0.008466948 |
| <b>WBGene00000618</b> | col-41     | 2.625518225  | 1.776511682  | 4.03E-12    |
| <b>WBGene00020593</b> | ugt-11     | 0.76287649   | 0.626216362  | 0.006215034 |
| <b>WBGene00020672</b> | T22B7.3    | -0.8327133   | -0.712575414 | 0.001205375 |
| <b>WBGene00020741</b> | dlhd-1     | -0.778435965 | -0.589875907 | 0.002146601 |
| <b>WBGene00006580</b> | tlp-1      | -1.288926077 | -1.428515348 | 1.66E-47    |
| <b>WBGene00012176</b> | W01C9.2    | -1.21964494  | -1.070826542 | 2.93E-13    |
| <b>WBGene00012186</b> | mlt-11     | 2.215830351  | 2.23358973   | 0.002590163 |
| <b>WBGene00012257</b> | lpr-4      | 1.515457468  | 1.80623996   | 0.009711254 |
| <b>WBGene00021046</b> | sedl-1     | -0.712192687 | -0.609003467 | 0.00047104  |
| <b>WBGene00001397</b> | fat-5      | -1.452723621 | -1.297754583 | 7.81E-17    |
| <b>WBGene00022415</b> | Y102A11A.5 | 0.805756904  | 0.99737207   | 0.00887945  |
| <b>WBGene00044754</b> | Y119C1B.12 | -1.587289173 | -1.204331589 | 1.56E-15    |
| <b>WBGene00012591</b> | nspe-1     | -0.635750979 | -0.798479971 | 1.26E-05    |
| <b>WBGene00012594</b> | nspe-5     | -1.37550176  | -1.512783653 | 8.43E-07    |
| <b>WBGene00012604</b> | nspe-2     | -0.959758764 | -0.862855831 | 0.002151654 |
| <b>WBGene00012664</b> | Y39B6A.1   | -1.36144743  | -1.064815125 | 6.26E-22    |
| <b>WBGene00012682</b> | asp-16     | -1.856752051 | -1.145877449 | 8.43E-07    |
| <b>WBGene00012686</b> | Y39B6A.27  | -0.641432197 | -0.606921321 | 0.000165996 |
| <b>WBGene00012757</b> | Y41C4A.11  | -1.050935609 | -0.624525608 | 2.07E-08    |
| <b>WBGene00001066</b> | dpy-4      | 2.244278221  | 1.084974679  | 9.05E-06    |
| <b>WBGene00021625</b> | Y47D7A.13  | -0.661014897 | -0.912068271 | 0.000506307 |
| <b>WBGene00013146</b> | Y53C12B.7  | -0.932944993 | -0.859443248 | 8.54E-06    |
| <b>WBGene00001730</b> | grl-21     | -0.893335276 | -1.649981022 | 1.11E-06    |
| <b>WBGene00000749</b> | col-176    | -1.616138911 | -1.198710275 | 1.46E-19    |
| <b>WBGene00013875</b> | cest-2.1   | 1.33554399   | 1.039928102  | 1.24E-10    |
| <b>WBGene00013901</b> | ugt-16     | 0.819222034  | 0.65745035   | 3.80E-10    |
| <b>WBGene00004398</b> | rol-8      | 1.487286437  | 0.889213287  | 0.006095695 |
| <b>WBGene00006956</b> | wrt-10     | 1.478264212  | 1.997867599  | 0.007558535 |
| <b>WBGene00013935</b> | ZK218.1    | -0.628152473 | -1.136345478 | 0.002590163 |
| <b>WBGene00004176</b> | pqn-97     | -0.815659757 | -0.878289832 | 0.006755617 |
| <b>WBGene00004177</b> | pqn-98     | -1.326503874 | -0.638783863 | 0.001302309 |
| <b>WBGene00013986</b> | ZK512.7    | -1.406384073 | -1.287844334 | 5.62E-06    |
| <b>WBGene00014173</b> | ZK970.7    | -1.053655026 | -0.63716855  | 0.002512822 |



**Table S3:** 8 genes with differential transcript abundances : ‘cec-4Δ’ vs ‘WT’

Genes meeting significance criteria (FDR < 0.01) and (FC > 1.5), specified by the following five tab-delimited columns: Wormbase ‘GeneID’, the primary gene name or sequence name as extracted from Wormbase release 273 (Nov-1 2019) in ‘gene name’, the fold-changes of log<sub>2</sub> expression values of a first replicate sample pair in ‘FC\_log2\_repl\_a’, the fold-changes of log<sub>2</sub> expression values of second replicate sample pair in ‘FC\_log2\_repl\_b’ (see Figure 7A), and the p-values for differential expression multiplicity corrected by the Benjamini-Hochberg method in ‘FDR’

| #GeneID        | gene name | FC_log2_repl_a | FC_log2_repl_b | FDR        |
|----------------|-----------|----------------|----------------|------------|
| WBGene00015642 | C09E7.8   | 0.703518392    | 0.910599517    | 3.4546E- 3 |
| WBGene00005832 | srw-85    | 4.995608769    | 5.310109059    | 3.02E-261  |
| WBGene00008652 | F10D11.6  | -0.720329215   | -0.803017515   | 8.761E-3   |
| WBGene00006733 | ufd-1     | 0.766788026    | 0.779178976    | 2.80E-16   |
| WBGene00017990 | cec-4     | -1.49582333    | -1.334384792   | 1.49E-18   |
| WBGene00000653 | col-77    | -1.59861625    | -0.671500083   | 8.85E-05   |
| WBGene00021625 | Y47D7A.13 | -1.23942259    | -0.699298362   | 1.76E-05   |
| WBGene00021977 | Y58A7A.3  | 0.66690218     | 1.127006874    | 5.625E-05  |

**Table S4:** 27 genes with compensatory effects upon *cec-4* deletion in the *LMN-Y59C* background

Genes changing significantly in both the '*LMN-Y59C*' vs 'WT' and the '*LMN-Y59C; cec-4Δ*' vs '*LMN-Y59C*' comparisons were examined for compensatory effects upon *cec-4* deletion. This is defined as an opposing sign of the logFCs in the two comparisons.

Compensating genes specified by the following eight tab-delimited columns: Wormbase 'GeneID', the primary gene name or sequence name as extracted from Wormbase release 273 (Nov-1 2019) in 'gene name', and three columns each for the contrasts with the fold-changes of log2 expression values of a first replicate sample pair in 'FC\_log2\_repl\_a', the fold-changes of log2 expression values of second replicate sample pair in 'FC\_log2\_repl\_b' (see Figure 7A), and the p-values for differential expression multiplicity corrected by the Benjamini-Hochberg method in 'FDR'

| #geneID        | gene name  | FC_log2_repl_a | FC_log2_repl_b | FDR        | FC_log2_repl_a | FC_log2_repl_b | FDR         |
|----------------|------------|----------------|----------------|------------|----------------|----------------|-------------|
| WBGene00044754 | Y119C18.12 | 2.004118858    | 0.877313069    | 2.16E-06   | -1.587289173   | -1.204331589   | 1.56E-15    |
| WBGene00044658 | C01G10.17  | 0.70756948     | 0.748238635    | 0.00698598 | -0.776487961   | -0.934996607   | 0.000400198 |
| WBGene00022415 | Y102A11A.5 | -1.263161256   | -0.923328151   | 0.00106727 | 0.805756904    | 0.99737207     | 0.00887945  |
| WBGene00020672 | T22B7.3    | 0.626586302    | 1.159028666    | 0.00148206 | -0.8327133     | -0.712575414   | 0.001205375 |
| WBGene00017937 | F30H5.3    | -1.802625934   | -1.168280929   | 1.36E-05   | 1.845431479    | 1.359379139    | 4.15E-07    |
| WBGene00012682 | asp-16     | 1.635731338    | 1.850660605    | 2.88E-08   | -1.856752051   | -1.145877449   | 8.43E-07    |
| WBGene00012186 | mlt-11     | -2.86502476    | -1.450413049   | 3.80E-07   | 2.215830351    | 2.23358973     | 0.002590163 |
| WBGene00009386 | tag-290    | 1.157588536    | 0.679279411    | 2.50E-09   | -0.832454552   | -0.708859532   | 4.67E-08    |
| WBGene00009384 | piit-1     | 1.436386638    | 0.761660059    | 5.98E-09   | -1.109261629   | -1.169271692   | 2.72E-25    |
| WBGene00009222 | fbxa-95    | 1.199188813    | 1.263198915    | 3.72E-10   | -0.811447212   | -0.928947721   | 1.28E-05    |
| WBGene00008816 | F14F8.8    | 1.750918948    | 0.970867683    | 1.48E-11   | -1.515889622   | -1.323529738   | 3.80E-10    |
| WBGene00008425 | D2045.8    | -1.302448525   | -0.690538447   | 6.73E-09   | 0.661674808    | 0.632749509    | 0.000237255 |
| WBGene00006956 | wrt-10     | -2.226775253   | -0.814139956   | 0.00029094 | 1.478264212    | 1.997867599    | 0.007558535 |
| WBGene00006580 | tlp-1      | 1.480757271    | 1.397247769    | 2.38E-76   | -1.288926077   | -1.428515348   | 1.66E-47    |
| WBGene00005018 | sqt-3      | -2.440491213   | -1.533413751   | 1.60E-12   | 2.226578087    | 1.5849746      | 7.16E-12    |
| WBGene00005017 | sqt-2      | -2.226775253   | -1.496199671   | 4.18E-10   | 2.285299011    | 1.488269169    | 2.31E-10    |
| WBGene00005016 | sqt-1      | -2.929635629   | -1.607179923   | 3.30E-07   | 3.062803781    | 1.396039308    | 6.64E-05    |
| WBGene00004397 | rol-6      | -3.092764376   | -2.232549737   | 2.07E-20   | 2.700779222    | 1.862226069    | 4.48E-14    |
| WBGene00003099 | lys-10     | 0.746369523    | 0.904206337    | 0.00702846 | -1.148415596   | -0.929076722   | 4.04E-05    |
| WBGene00003079 | lsm-5      | 1.504614269    | 1.433013081    | 1.34E-76   | -0.941982888   | -1.088837959   | 9.53E-24    |
| WBGene00001397 | fat-5      | 1.291739256    | 1.119019514    | 3.89E-15   | -1.452723621   | -1.297754583   | 7.81E-17    |
| WBGene00001067 | dpy-5      | -2.522815368   | -1.959014444   | 2.61E-16   | 2.325929137    | 1.482561198    | 2.36E-09    |
| WBGene00001066 | dpy-4      | -2.662614875   | -1.721999398   | 2.18E-12   | 2.244278221    | 1.084974679    | 9.05E-06    |
| WBGene00000749 | col-176    | 0.876720354    | 1.221856909    | 1.05E-07   | -1.616138911   | -1.198710275   | 1.46E-19    |
| WBGene00000649 | col-73     | -1.540711087   | -1.439767633   | 4.50E-07   | 0.998135474    | 1.090297863    | 0.000286311 |
| WBGene00000618 | col-41     | -2.750996739   | -2.793667973   | 2.29E-16   | 2.625518225    | 1.776511682    | 4.03E-12    |
| WBGene00000606 | col-17     | -2.694557575   | -1.329917085   | 1.47E-07   | 2.206529522    | 1.454346057    | 1.79E-08    |

| Strain | Genotype                                                                                                                                                                                                                                                           | Reference                     |
|--------|--------------------------------------------------------------------------------------------------------------------------------------------------------------------------------------------------------------------------------------------------------------------|-------------------------------|
| N2     | Wild-type Bristol isolate                                                                                                                                                                                                                                          |                               |
| GW76   | <i>gwls4 [myo-3::rfp baf-1::gfp-lacI let-858 3'UTR]X</i>                                                                                                                                                                                                           | Meister et al. 2010           |
| GW164  | <i>emr-1(gk119); gwls4 [myo-3::rfp baf-1::gfp-lacI let-858 3'UTR]X</i>                                                                                                                                                                                             |                               |
| GW201  | <i>lem-2 (tm1582); gwls4 [myo-3::rfp baf-1::gfp-lacI let-858 3'UTR]X</i>                                                                                                                                                                                           |                               |
| BN403  | <i>Integrated Pemr-1::emr-1::mcherry::emr-1 3'UTR and GFP::LMN-1 wt. Made by crossing BN225 and YG301 or GW342; bqSi225[pBN34(unc-119(+)) Pemr-1::emr-1::mcherry] IV; ygls1[baf-1::gfp::lmn-1 unc119(+)]</i>                                                       | Mattout et al, 2011 for GW342 |
| BN404  | <i>Integrated Pemr-1::emr-1::mcherry::emr-1 3'UTR and GFP::LMN-1 Y59C. Made by crossing BN225 and YG117 or GW341; bqSi225[pBN34(unc-119(+)) Pemr-1::emr-1::mcherry] IV; ygls2[baf-1::gfp::lmn-1 Y59C unc119(+)]</i>                                                | Mattout et al, 2011 for GW341 |
| GW653  | <i>ygls2[baf-1p::GFP-lmn-1 Y59C; unc-119(+)]; unc-119(ed-3)</i>                                                                                                                                                                                                    | Mattout et al. 2011           |
| GW654  | <i>ygls2[baf-1p::GFP-lmn-1 Y59C; unc-119(+)]; unc-119; gwls4 [myo-3::rfp baf-1::gfp-lacI let-858 3'UTR]X</i>                                                                                                                                                       | Mattout et al. 2011           |
| GW656  | <i>ygls1[baf-1p::GFP-lamin wt; unc-119(+)]; unc-119(ed-3) gwls4[baf-1p::GFP-lacI::let-858 3'UTR; myo-3::rfp]</i>                                                                                                                                                   | Mattout et al. 2011           |
| GW833  | <i>cec-4 (ok3124) IV; gwls4[baf-1p::GFP-lacI::let-858 3'UTR; myo-3::rfp]</i>                                                                                                                                                                                       | Gonzalez-Sandoval et al. 2015 |
| GW888  | <i>ygls2[baf-1p::GFP-lmn-1 Y59C; unc-119(+)]; cec-4(ok3124), IV; gwls4 [baf-1::GFP-lacI let858 myo3::RFP] X.</i>                                                                                                                                                   | Gonzalez-Sandoval et al. 2015 |
| GW1026 | <i>ygls2[baf-1p::GFP-lmn-1 Y59C; unc-119(+)] II unc-119(ed3); gwSi17 [cec-4p::CEC-4-WmCherry::cec-4 3'UTR] II; cec-4(ok3124) IV; gwls4[myo-3::RFP baf-1::GFP lacI let-858] X.;</i>                                                                                 | Gonzalez-Sandoval et al. 2015 |
| GW1066 | <i>ygls2[baf-1p::GFP-lmn-1 Y59C; unc-119(+)] II unc-119(ed3), gwSi18 [cec-4p::CEC-4_Y87A_Y111A-WmCherry::cec-4 3'UTR] ttTi5605 II; cec-4(ok3124) IV; gwls4[myo-3::RFP baf-1::GFP lacI let-858] X.</i>                                                              | Gonzalez-Sandoval et al. 2015 |
| GW1214 | <i>lem-2 (tm1582)</i>                                                                                                                                                                                                                                              | This study                    |
| GW1226 | <i>ygls2[baf-1p::GFP-lmn-1 Y59C; unc-119(+)]; unc-119(ed-3) lem-2(tm1582)</i>                                                                                                                                                                                      | This study                    |
| GW1340 | <i>gwls4 X ; lem-2(tm1582) ygls2[baf-1p::GFP-lmn-1 Y59C; unc-119(+)]; unc-119(ed-3)</i>                                                                                                                                                                            | This study                    |
| GW1394 | <i>bqSi225 [pBN34(unc-119(+)) Pemr-1::emr-1::mcherry] IV; gwls59 [pha-4::mCherry; unc-119(+); 256xLacO;4xLexA]; gwls39 [baf-1::GFP-LacI::let-858 3'UTR; vit-5::GFP]</i>                                                                                            | This study                    |
| GW1395 | <i>bqSi225 [pBN34(unc-119(+)) Pemr-1::emr-1::mcherry] IV; gwls59 [pha-4::mCherry; unc-119(+); 256xLacO;4xLexA]; gwls39 [baf-1::GFP-LacI::let-858 3'UTR; vit-5::GFP]; cec-4 (ok3124) IV</i>                                                                         | This study                    |
| GW1468 | <i>ygls2[baf-1p::GFP-lmn-1 Y59C; unc-119(+)]; unc-119(ed-3); cec-4(ok3124) IV</i>                                                                                                                                                                                  | This study                    |
| GW1480 | <i>ygls1[baf-1p::GFP-lamin wt; unc-119(+)]; unc-119(ed-3); Pmyo-3::FLP-D5 on chr IV.; bqsi433[pBN209(unc-119(+)); Phsp16.41::FRT::mCh::his-58::FRT::dam::emr-1] II; bqSi495[pBN260(unc-119(+)) Pmyo-3::FLP_D5] IV. May carry unc-119(ed9) III.</i>                 | This study                    |
| GW1481 | <i>ygls1[baf-1p::GFP-lamin wt; unc-119(+)]; unc-119(ed-3); bqSi447[pBN181(unc-119(+)) Phsp16.41::FRT::mCh::his 58::FRT::gfp::dam] II; bqSi495[pBN260(unc-119(+)) Pmyo-3::FLP_D5] IV.; May carry unc-119(ed9) III.</i>                                              | This study                    |
| GW1482 | <i>cec-4(ok3124) IV; ygls[baf-1p::GFP-lamin wt; unc-119(+)]; unc-119(ed-3); Pmyo-3::FLP-D5 on chr IV.; bqsi433[pBN209(unc-119(+)) Phsp16.41::FRT::mCh::his-58::FRT::dam::emr-1] II; bqSi495[pBN260(unc-119(+)) Pmyo-3::FLP_D5] IV. May carry unc-119(ed9) III.</i> | This study                    |
| GW1483 | <i>cec-4(ok3124) IV; ygls1[baf-1p::GFP-lamin wt; unc-119(+)]; unc-119(ed-3); bqSi447[pBN181(unc-119(+)) Phsp16.41::FRT::mCh::his-58::FRT::gfp::dam] II; bqSi495[pBN260(unc-119(+)) Pmyo-3::FLP_D5] IV. May carry unc-119(ed9) III.</i>                             | This study                    |
| GW1485 | <i>ygls2[baf-1p::GFP-lmn-1 Y59C; unc-119(+)]; unc-119(ed-3); bqSi447[pBN181(unc-119(+)) Phsp16.41::FRT::mCh::his-58::FRT::gfp::dam] II; bqSi495[pBN260(unc-119(+)) Pmyo-3::FLP_D5] IV. May carry unc-119(ed9) III.</i>                                             | This study                    |

|        |                                                                                                                                                                                                                                                                      |            |
|--------|----------------------------------------------------------------------------------------------------------------------------------------------------------------------------------------------------------------------------------------------------------------------|------------|
| GW1486 | <i>cec-4(ok3124) IV; yglS2[baf-1p::GFP-lmn-1 Y59C; unc-119(+)]; unc-119(ed-3); Pmyo-3::FLP-D5 on chr IV. bqsi433[pBN209(unc-119(+)) Phsp16.41::FRT::mCh::his-58::FRT::dam::emr-1] II; bqSi495[pBN260(unc-119(+)) Pmyo-3::FLP_D5] IV. May carry unc-119(ed9) III.</i> | This study |
| GW1487 | <i>cec-4(ok3124) IV; yglS2[baf-1p::GFP-lmn-1 Y59C; unc-119(+)]; unc-119(ed-3); bqSi447[pBN181(unc-119(+)); Phsp16.41::FRT::mCh::his-58::FRT::gfp::dam] II; bqSi495[pBN260(unc-119(+)) Pmyo-3::FLP_D5] IV. May carry unc-119(ed9) III.</i>                            | This study |
| GW1491 | <i>myo-3(st386) V. ; stEx30[Pmyo-3::GFP rol-6(su1006)]; cec-4(ok3124) IV</i>                                                                                                                                                                                         | This study |
| GW1492 | <i>myo-3(st386) V. ; stEx30[Pmyo-3::GFP rol-6(su1006)]; yglS1[baf-1p::GFP-lamin wt; unc-119(+)]; unc-119(ed-3)</i>                                                                                                                                                   | This study |
| GW1493 | <i>myo-3(st386) V. ; stEx30[Pmyo-3::GFP rol-6(su1006)]; yglS1[baf-1p::GFP-lamin wt; unc-119(+)]; unc-119(ed-3); cec-4(ok3124) IV</i>                                                                                                                                 | This study |
| GW1494 | <i>myo-3(st386) V. ; stEx30 [myo-3p::GFP::myo-3 + rol-6(su1006)] yglS2[baf-1p::GFP-lmn-1 Y59C; unc-119(+)]; unc-119(ed-3);</i>                                                                                                                                       | This study |
| GW1495 | <i>myo-3(st386) V. ; stEx30[Pmyo-3::GFP rol-6(su1006)]; yglS2[baf-1p::GFP-lmn-1 Y59C; unc-119(+)]; unc-119(ed-3); cec-4(ok3124) IV</i>                                                                                                                               | This study |
| GW1508 | <i>yglS2[baf-1p::GFP-lmn-1 Y59C; unc-119(+)]; unc-119(ed-3); Pmyo-3::FLP-D5 on chr IV. bqsi433[pBN209(unc-119(+)) Phsp16.41::FRT::mCh::his-58::FRT::dam::emr-1] II; bqSi495[pBN260(unc-119(+)) Pmyo-3::FLP_D5] IV. May carry unc-119(ed9) III.</i>                   | This study |
| RW1596 | <i>myo-3(st386) V. ; stEx30 [myo-3p::GFP::myo-3 + rol-6(su1006)]</i>                                                                                                                                                                                                 | CGC        |
| GW1754 | <i>yglS1[baf-1p::GFP-lamin wt; unc-119(+)]; unc-119(ed-3) gwls4[baf-1p::GFP-lacI::let-858 3'UTR; myo-3::rfp]; cec-4(ok3124) IV</i>                                                                                                                                   | This study |

**Table S5:** *C. elegans* strains used in this study
